# Supplementary material for: S6K1 phosphorylates Cdk1 and MSH6 to regulate DNA repair
Source: PubMed Central journal article supplement (PMC9529248; doi:10.7554/elife.79128), 2022-10-03
Supplement: elife-79128-fig3-data1.pdf [file elife-79128-fig3-data1.pdf]

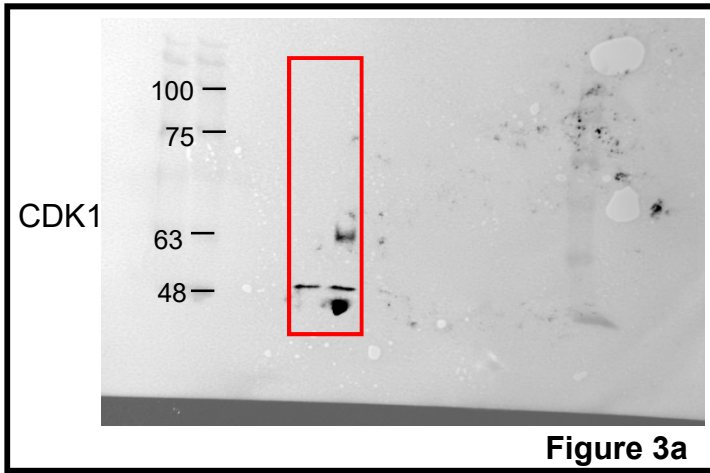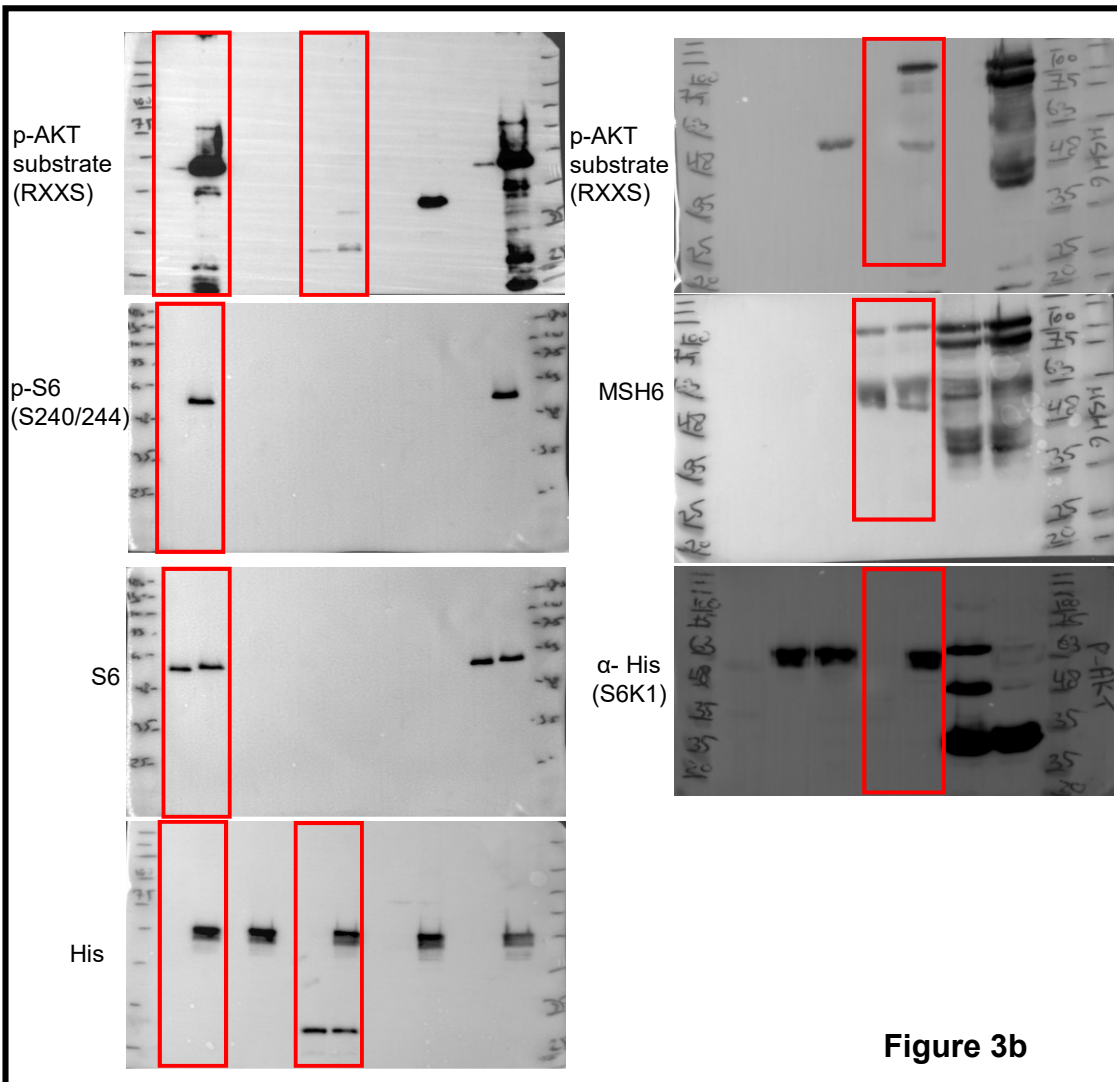

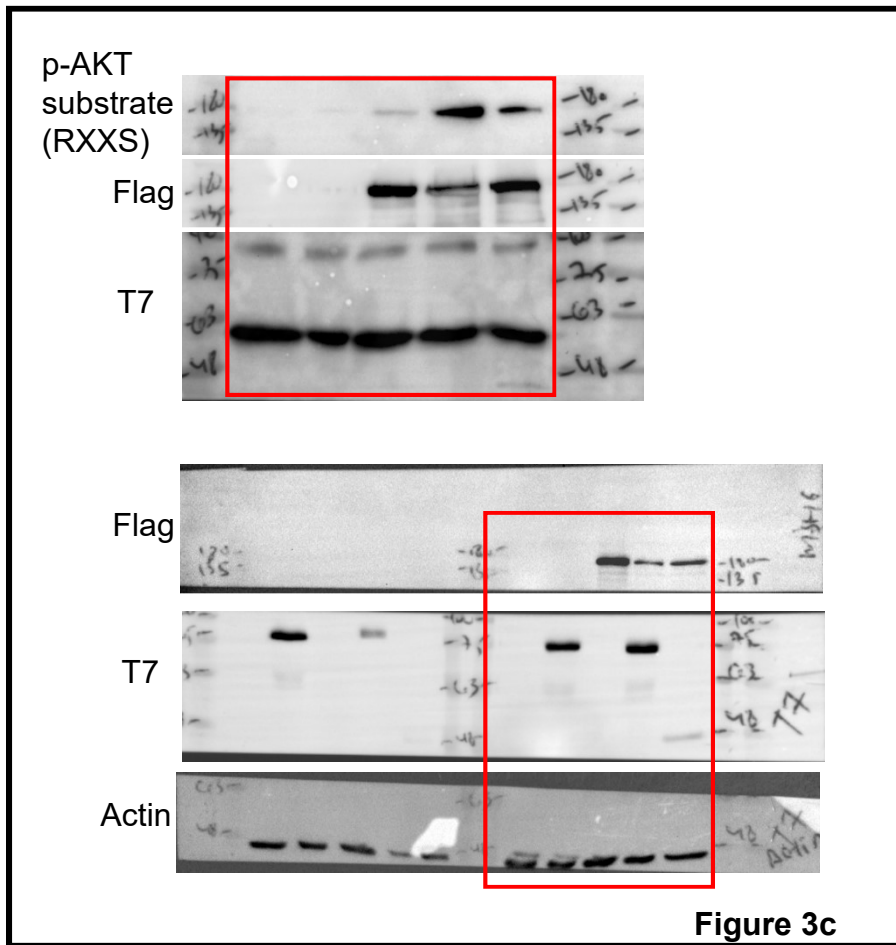

Figure 3c

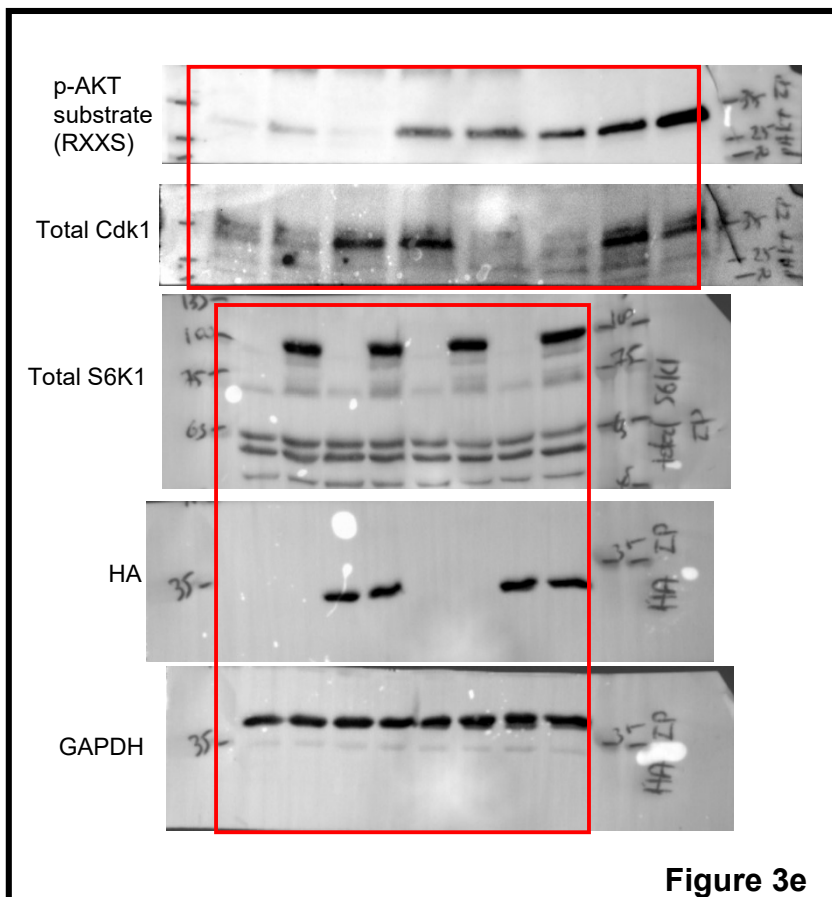

Figure 3e
