# Supplementary material for: S6K1 phosphorylates Cdk1 and MSH6 to regulate DNA repair
Source: eLife journal article supplement (doi:10.7554/elife.79128), 2022-08-30
Supplement: fig1-figsupp1-data1 [file elife-79128-fig1-figsupp1-data1-v1.pdf]

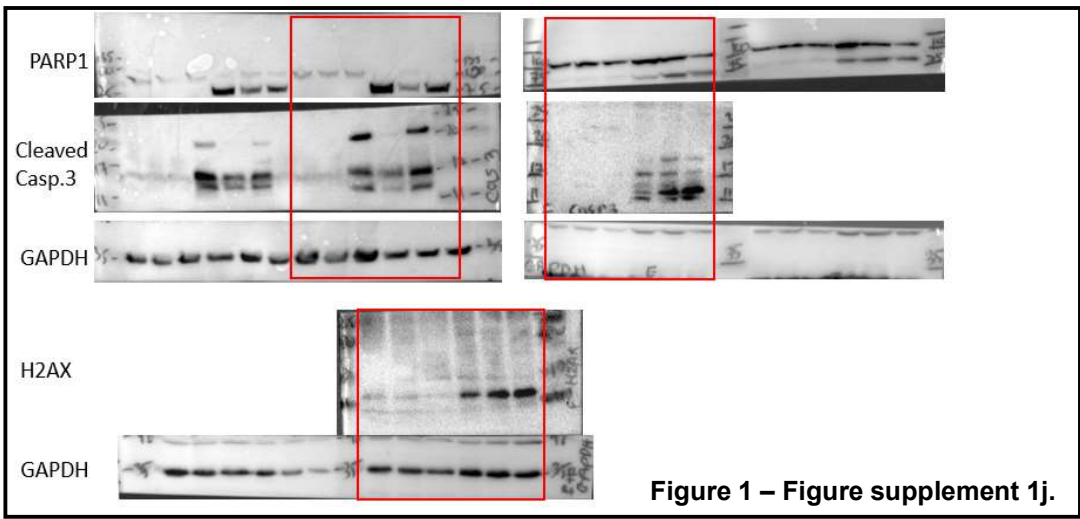

Figure 1 – Figure supplement 1j.

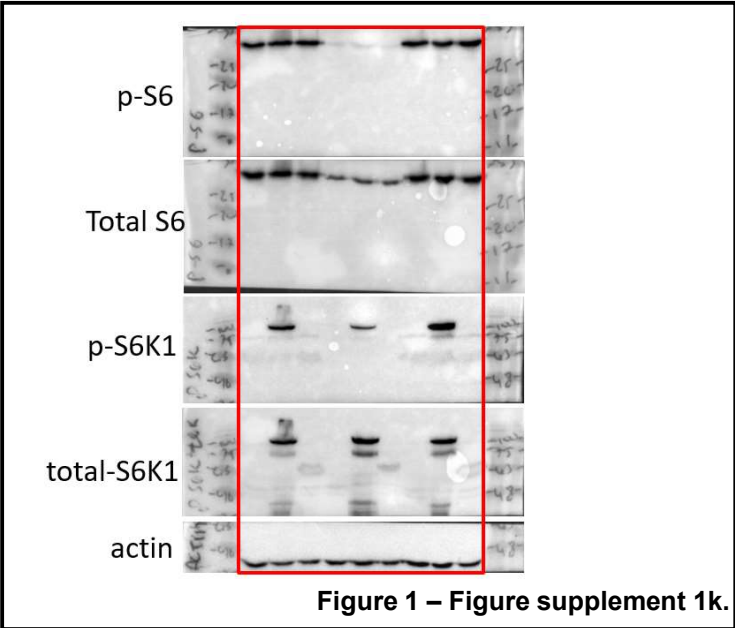

Figure 1 – Figure supplement 1k.
