# Supplementary material for: S6K1 phosphorylates Cdk1 and MSH6 to regulate DNA repair
Source: eLife journal article supplement (doi:10.7554/elife.79128), 2022-08-30

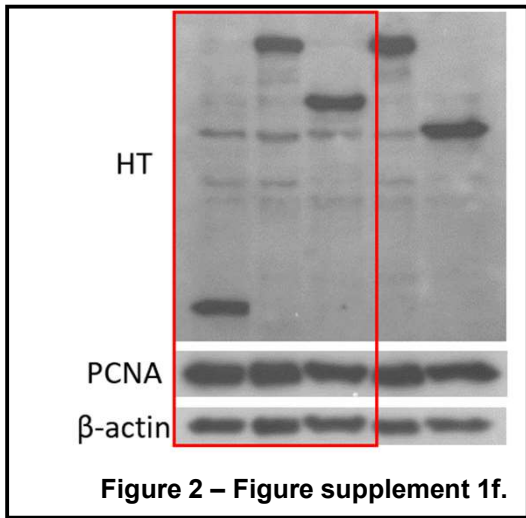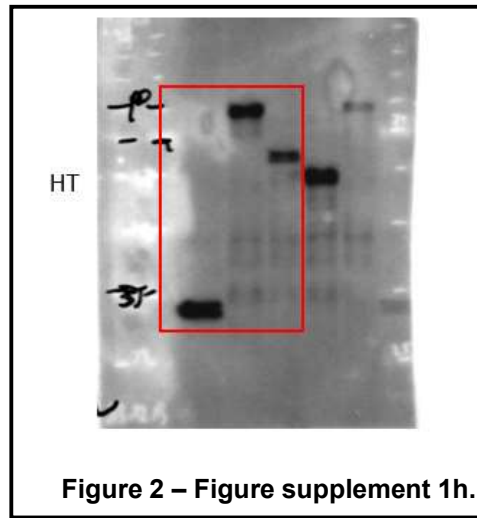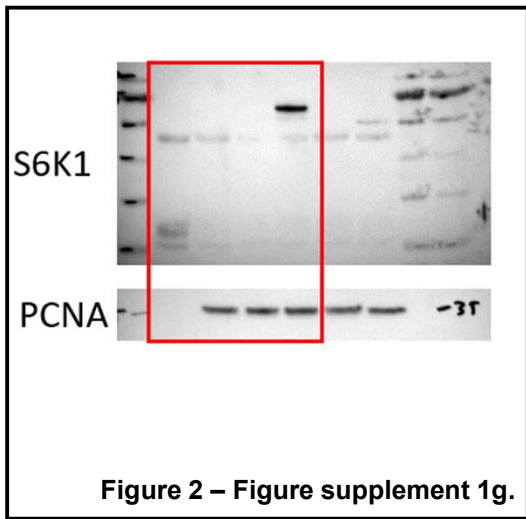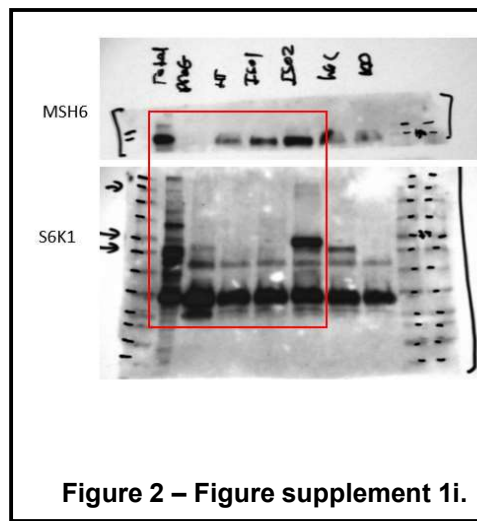

Supplement: fig2-figsupp1-data1 [file elife-79128-fig2-figsupp1-data1-v1.pdf]
