# Supplementary material for: S6K1 phosphorylates Cdk1 and MSH6 to regulate DNA repair
Source: eLife. 2022 Oct 3;11:e79128. doi: 10.7554/eLife.79128 (PMC9529248; doi:10.7554/eLife.79128)
Supplement: Supplementary file 1. — MS results of pull-downs performed on HEK293 cells transfected with Halo-Tag (HT)-S6K1 isoforms as described in section meterials and Methods. Proteins that were found bound to either of the (HT)-S6K1 isoforms by both methods are highlighted in yellow (total of 164 matches). [file elife-79128-supp1.xlsx]

## Sheet: Table S1
Supplementary File 1. Proteomic-Mass spectrometry (MS) performed in HEK 293 HT-S6K1 and HT-Iso-2 and HT-S6K1 Kinase dead (K123) isoforms.
on bead digestion	Gene names	S6K1	Iso-2	S6K1 K123A		gel-extracted samples	Gene names	S6K1	Iso-2
1	AAAS		+			1	1433E		+
2	AARS2		+			2	1433Z		+
3	ABCB6		+			3	1A02		+
4	ABCB7		+	+		4	1B07		+
5	ABCD3		+			5	4F2	+	+
6	ABHD12		+			6	ABCD3	+	+
7	ABHD16A		+			7	ABCF2		+
8	ACADM		+			8	ACADM		+
9	ACADSB		+			9	ACAT1		+
10	ACAT1		+			10	ACATN		+
11	ACSL1		+			11	ACLY		+
12	ACSL3		+			12	ACOT8		+
13	ADCK3; CABC1		+			13	ACOT9		+
14	ADCK4		+			14	ACSL3		+
15	ADPGK	+	+	+		15	ACTBM		+
16	AFG3L2		+			16	ADAS	+	+
17	AGK		+			17	ADCK3; CABC1		+
18	AGPAT3		+			18	AFG3L2		+
19	ALDH18A1		+	+		19	AGK		+
20	ALDH1B1		+			20	AIFM1	+	+
21	ALDH3A2		+			21	ALDH1B1		+
22	ARF3;ARF1		+			22	ALDH2		+
23	ARF4	+	+	+		23	ARAF		+
24	ARF5		+			24	ARF3;ARF1	+	+
25	ARL6IP5		+			25	ARF4	+	+
26	ARL8A			+		26	ARF5		+
27	ARL8B		+			27	ARL1		+
28	ASPH			+		28	ARMC6		+
29	ASPHD2			+		29	ARP2		+
30	ATAD3A		+			30	AT12A		+
31	ATL2		+			31	AT2A1	+	+
32	ATP13A1		+			32	ATAD3A		+
33	ATP1A1		+			33	ATP1A1	+	+
34	ATP1B3		+	+		34	ATP2A2	+	+
35	ATP2A2		+			35	ATP5C1	+	+
36	ATP5A1		+			36	ATP5F1		+
37	ATP5B		+			37	ATP5H		+
38	ATP5C1		+			38	ATP5L	+	+
39	ATP5F1		+			39	ATP5O		+
40	ATP5I		+			40	ATX10		+
41	ATP5L		+			41	AUP1		+
42	ATP5O		+	+		42	AURKB		+
43	AUP1		+			43	BAF		+
44	B3GAT3		+	+		44	BAG2		+
45	B3GNT1		+			45	BAG6;BAT3		+
46	BAG2		+	+		46	BSG		+
47	BAG6;BAT3		+			47	C19orf52		+
48	BAK1		+	+		48	C1QBP		+
49	BRP44		+			49	C1TC		+
50	BSG		+	+		50	C2orf47		+
51	BST2	+	+	+		51	CAD	+	+
52	C12orf73		+			52	CAND1		+
53	C19orf52		+			53	CC001		+
54	C1orf212		+			54	CCT2		+
55	C1QBP		+			55	CCT3	+	+
56	C21orf33		+			56	CCT4		+
57	C2orf47		+			57	CCT5		+
58	C7orf44		+			58	CCT6A		+
59	CAD	+	+	+		59	CCT7		+
60	CAND1		+			60	CCT8		+
61	CANT1		+			61	CDC37	+	-
62	CCDC124	+	+	+		62	CDC45		+
63	CCDC127		+			63	CDIPT		+
64	CCDC47		+			64	CDK1	+	+
65	CCT2		+			65	CDKAL1		+
66	CCT3		+			66	CEPT1		+
67	CCT4		+			67	CHCH6		+
68	CCT5		+			68	CHP1		+
69	CCT6A		+			69	CI046	+	-
70	CCT7		+			70	CLPX		+
71	CCT8		+			71	CMC1	+	+
72	CDC37			+		72	CNDD3		+
73	CDK1	+	+	+		73	COPA		+
74	CDKAL1		+			74	COPB		+
75	CECR5		+			75	COPB2		+
76	CERS2;LASS2		+			76	COPD		+
77	CERS5;LASS5		+			77	COPE		+
78	CIRBP			+		78	COPG2		+
79	CLN6		+			79	COT1		+
80	CLPTM1L		+	+		80	COX15		+
81	CLPX		+			81	COX2	+	+
82	CLTC	+				82	COX7A2L	+	-
83	CNP		+	+		83	CYC1		+
84	COMT		+			84	DARS		+
85	COMTD1		+			85	DDB1		+
86	COPA		+	+		86	DDOST	+	+
87	COQ5		+	+		87	DDX20		+
88	CORO7;PAM16		+	+		88	DERL1		+
89	COX15		+			89	DHB11		+
90	COX20		+			90	DHC24N		+
91	COX5A		+	+		91	DHRS7B		+
92	COX5B			+		92	DHSA	+	-
93	COX6C		+	+		93	DIC	+	+
94	COX7A2		+	+		94	DNAJA1	+	+
95	COX7A2L		+			95	DNAJA2		+
96	CPT1A		+			96	DNAJC11		+
97	CPT2			+		97	DNJA3		+
98	CYB5R1		+			98	DPM1	+	+
99	CYC1		+	+		99	DX39A		+
100	DARS		+			100	DYNC1H1	+	+
101	DCAKD		+			101	EBP		+
102	DDOST		+			102	ECM29		+
103	DERL1		+			103	EF1B		+
104	DHRS3		+			104	EF1G	+	+
105	DHRS7B		+			105	EF2	+	+
106	DNAJA1		+	+		106	EHD4		+
107	DNAJA2	+	+	+		107	ELOV5		+
108	DNAJC11		+	+		108	ENPL	+	-
109	DNAJC19		+			109	ERD21		+
110	DNAJC7		+			110	ERGI1		+
111	DPM1		+			111	ERLIN2		+
112	DPY19L1		+			112	ERLN1	+	+
113	DPY19L3		+			113	ESYT2		+
114	DYNC1H1	+				114	ETFA		+
115	EARS2		+			115	EXOC4		+
116	EEF1A1;EEF1A1P5	+		+		116	F115A		+
117	ELOVL4	+	+			117	FACD2		+
118	EMC6		+			118	FAF2		+
119	EPT1		+	+		119	FAKD5		+
120	ERGIC3		+			120	FANCI		+
121	ERLIN2		+			121	FAR1	+	+
122	ERMP1			+		122	FASN		+
123	ETFA		+			123	FXL12		+
124	EWSR1			+		124	GANAB		+
125	EXD2		+	+		125	GBB1	+	+
126	FAF2		+	+		126	GBLP	+	+
127	FAM20B		+	+		127	GCDH		+
128	FAM3C		+			128	GCN1L1		+
129	FAM82A2		+			129	GCP2		+
130	FAR1		+			130	GET4		+
131	FASN	+				131	GL8D1		+
132	FDFT1		+			132	GRP75	+	+
133	FKBP8		+			133	H90B2	+	+
134	FUNDC2		+	+		134	H90B3	+	+
135	FUS			+		135	HACD2		+
136	GALK1			+		136	HACD3	+	+
137	GALNT2		+	+		137	HADHB		+
138	GCDH		+			138	HAX1		+
139	GCN1L1		+	+		139	HBEBP2BPA; MPDU1	+	+
140	GGCX		+			140	HEAT1		+
141	GLS		+			141	HEAT2		+
142	GNA11;GNAQ		+			142	HELLS		+
143	GNAS		+			143	HNRH1		+
144	GNB2		+	+		144	HNRPM		+
145	GNPAT		+			145	HNRPU		+
146	GOSR2			+		146	HS904	+	+
147	GPR180		+	+		147	HS90B	+	+
148	HADHA		+	+		148	HSD17B12; DHB12	+	+
149	HADHB		+	+		149	HSP72	+	+
150	HAX1		+			150	HSP90AA1	+	+
151	HBEBP2BPA; MPDU1		+			151	HSPA5; GRP78	+	+
152	HLA-C		+			152	HSPB1	+	+
153	HM13		+			153	HUWE1		+
154	HMGN2		+	+		154	IDHP		+
155	HSD17B12; DHB12		+			155	IF4A1		+
156	HSP90AA1			+		156	ILF2		+
157	HSPA13		+	+		157	IMB1		+
158	HSPA1B;HSPA1A	+	+			158	IPO7	+	+
159	HSPA5; GRP78	+	+	+		159	IPO9		+
160	HSPA8	+	+			160	IRS4	+	+
161	HUWE1		+			161	K6PF		+
162	IARS2		+			162	KBL		+
163	IDH3B		+			163	KPNA2		+
164	IDH3G		+			164	L2HGDH		+
165	IMPAD1		+	+		165	LAP2A	+	+
166	IPO7		+	+		166	LBR	+	+
167	KIAA1715; LNP		+			167	LDHA	+	+
168	KPNA2		+			168	LDHB		+
169	L2HGDH		+			169	LMNB2	+	+
170	LARS;PIG44		+	+		170	LPCAT1		+
171	LBR		+			171	LRC59		+
172	LCLAT1		+			172	LRPPRC	+	+
173	LGALS3BP		+			173	MAGD1		+
174	LMAN1		+	+		174	MAGT1		+
175	LMAN2		+			175	MBOA5		+
176	LMF2		+			176	MBOAT7		+
177	LPCAT1		+			177	MCM7	+	+
178	LPGAT1		+			178	MD2L1		+
179	LRPPRC		+			179	MDN1		+
180	LSM14A			+		180	MED23		+
181	MARC1		+			181	METH		+
182	MARCKS		+			182	MGST3		+
183	MBOAT7		+			183	ML12A		+
184	MCCC2		+			184	MLEC	+	+
185	MCM7		+			185	MMS19		+
186	MCU		+			186	MP2K2		+
187	MGST2		+	+		187	MSH2	+	+
188	MLEC		+	+		188	MSH6		+
189	MMGT1		+			189	MTOR		+
190	MOGS		+	+		190	MYH10		+
191	MPV17L2		+			191	MYH11		+
192	MRPL16		+			192	MYH9	+	+
193	MSH2		+	+		193	MYL6		+
194	MSH6		+	+		194	MYL6B		+
195	MTCH1		+			195	MYO1A		+
196	MTFP1		+			196	MYO1B		+
197	MTHFD1L		+			197	MYO1C		+
198	MTX2		+			198	MYO6		+
199	NAMPT	+	+	+		199	NAMPT		+
200	NCLN		+	+		200	NDK8		+
201	NDUFA10		+			201	NDUBA		+
202	NDUFA13		+			202	NDUFA10		+
203	NDUFA3		+			203	NDUFA13	+	+
204	NDUFA4			+		204	NDUFA4		+
205	NDUFA5;DKFZp781K1356		+	+		205	NDUFA9		+
206	NDUFA9		+			206	NDUFS2		+
207	NDUFAF2		+	+		207	NDUFS3		+
208	NDUFC2		+	+		208	NSF		+
209	NDUFS1		+			209	NSUN2		+
210	NDUFS2		+			210	NT5D2		+
211	NDUFS3		+			211	NTPCR; C1orf57		+
212	NDUFS8		+			212	NU133		+
213	NDUFV1		+	+		213	NU188		+
214	NME3		+			214	NU205	+	+
215	NNT		+	+		215	NUP93	+	+
216	NOMO2; NOMO3; NOMO1		+			216	OAT	+	+
217	NRAS		+	+		217	ORC5		+
218	NSDHL		+			218	OXA1L		+
219	NSF		+	+		219	P5CR1		+
220	NTPCR; C1orf57		+	+		220	PABP1		+
221	NUP93		+			221	PCBP2		+
222	OAT		+			222	PCNA		+
223	OCLN			+		223	PDHB	+	+
224	OPA1		+			224	PEX3		+
225	OXA1L		+			225	PFKL		+
226	PDCD6		+	+		226	PFKP		+
227	PDHB		+			227	PGAM5	+	+
228	PEX16		+			228	PGRC1	+	-
229	PFKL		+	+		229	PM34		+
230	PFKP	+	+	+		230	PNO1		+
231	PHGDH		+	+		231	PRDX2	+	+
232	PIGG		+			232	PRKDC	+	+
233	PIGK		+			233	PRP6		+
234	PIGT		+			234	PRS4		+
235	PMAIP1			+		235	PSA		+
236	PMPCB		+			236	PSA4		+
237	PNO1			+		237	PSB2		+
238	POR		+	+		238	PSMC2		+
239	PPOX		+			239	PSMC4		+
240	PREB			+		240	PSMC5		+
241	PRKDC		+	+		241	PSMD2		+
242	PSMC2		+			242	PSMD3		+
243	PSMC4		+			243	PSMD6		+
244	PSMC5		+	+		244	PTSS1		+
245	PSMD2		+			245	PYR5		+
246	PSMD3	+	+	+		246	PYRG1	+	+
247	PTRH2		+			247	RAB13		+
248	PXMP2		+	+		248	RAB14	+	+
249	QIL1		+			249	RAB1A	+	+
250	RAB10		+	+		250	RAB1B; RAB1C		+
251	RAB11A		+	+		251	RAB21	+	-
252	RAB12			+		252	RAB2A	+	+
253	RAB13		+			253	RAB35		+
254	RAB14		+	+		254	RAB5A	+	+
255	RAB18		+	+		255	RAB8A	+	+
256	RAB1A		+	+		256	RAB9A		+
257	RAB1B; RAB1C		+	+		257	RAN	+	+
258	RAB21		+	+		258	RARS2		+
259	RAB23		+	+		259	RB33B		+
260	RAB24		+	+		260	RCN2		+
261	RAB2A		+	+		261	RDH11	+	+
262	RAB31;RAB22A		+			262	RER1		+
263	RAB32		+	+		263	RFC2		+
264	RAB35		+	+		264	RFC3		+
265	RAB4A		+	+		265	RHOA; RHOC	+	+
266	RAB5A		+			266	RHOG		+
267	RAB5C			+		267	RHOT2		+
268	RAB6A		+	+		268	RL23	+	+
269	RAB6B		+			269	RL38		+
270	RAB7A		+	+		270	RL40	+	+
271	RAB8A		+	+		271	RLA0	+	+
272	RAB8B		+			272	RM37		+
273	RAB9A		+	+		273	RPB2		+
274	RABL3		+			274	RPN2	+	+
275	RALA			+		275	RPS10; RPS10P5		+
276	RAN		+	+		276	RPS19	+	+
277	RAP1B		+	+		277	RPS27		+
278	RAP2C; RAP2A		+	+		278	Rps6kb1	+	+
279	RARS2		+			279	RS10		+
280	RDH11		+			280	RS10L	+	+
281	RDH14		+	+		281	RS11		+
282	RER1		+			282	RS12		+
283	RHOA; RHOC	+	+	+		283	RS14	+	+
284	RHOB		+	+		284	RS15A		+
285	RHOT1		+			285	RS16	+	+
286	RHOT2		+			286	RS2		+
287	RPL11	+				287	RS20		+
288	RPL21	+				288	RS27L		+
289	RPN1		+			289	RS3A		+
290	RPN2		+			290	RS4X		+
291	RPS10; RPS10P5	+		+		291	RS5	+	+
292	RPS18	+				292	RS7		+
293	RPS19			+		293	RSSA		+
294	RPS27	+				294	RUVBL1	+	+
295	RPS3	+	+			295	RUVBL2	+	+
296	RPS6KB1	+	+	+		296	S2540		+
297	RRAS2; RRAS		+	+		297	SAMHD1		+
298	RUVBL1		+			298	SBSN		+
299	RUVBL2		+	+		299	SCAMP3	+	+
300	S100A11			+		300	SCO2		+
301	SACM1L		+	+		301	SEC61A1	+	+
302	SAMHD1		+			302	SF3B3		+
303	SAR1A	+	+	+		303	SFXN1	+	+
304	SCAMP1		+			304	SFXN2		+
305	SCAMP2		+	+		305	SFXN4		+
306	SCAMP3		+			306	SLC16A1	+	+
307	SCARB2			+		307	SLC1A5	+	+
308	SCCPDH		+	+		308	SLC25A1	+	+
309	SCO2		+			309	SLC25A11	+	+
310	SDF4		+			310	SLC25A13	+	+
311	SEC22B		+	+		311	SLC25A22; SLC25A18		+
312	SEC61A1		+	+		312	SLC25A6	+	+
313	SELS;VIMP		+			313	SMC2		+
314	SFXN1		+			314	SMC3		+
315	SFXN4		+			315	SMC4		+
316	SGPL1		+			316	SMPD4		+
317	SHMT2		+			317	SPR2A	+	-
318	SLC16A1		+			318	SPTLC1		+
319	SLC1A5		+			319	SPTLC2		+
320	SLC25A1		+	+		320	SRPRB	+	+
321	SLC25A10		+			321	SSBP		+
322	SLC25A11		+			322	SSR4	+	+
323	SLC25A13		+			323	SSRA		+
324	SLC25A19		+			324	STOM		+
325	SLC25A20			+		325	SURF4		+
326	SLC25A22; SLC25A18		+			326	SYEP	+	+
327	SLC25A24		+			327	SYIC		+
328	SLC25A3		+			328	SYMC	+	+
329	SLC25A4		+			329	SYRC	+	+
330	SLC25A5		+	+		330	T161A		+
331	SLC25A6		+			331	TADBP		+
332	SLC27A2		+			332	TBA1B		+
333	SLC2A8	+	+	+		333	TBB3		+
334	SLC30A7		+			334	TBB4		+
335	SMPD4		+			335	TBB4Q		+
336	SPCS2		+	+		336	TBCD		+
337	SPNS1		+			337	TBG1		+
338	SPTLC1		+			338	TCP1		+
339	SPTLC2		+			339	TCPW		+
340	SRPRB		+	+		340	TECR	+	+
341	SSR3		+			341	TELO2		+
342	SSR4		+	+		342	TERA		+
343	STARD3		+			343	TFB2		+
344	STAT1	+	+	+		344	THADA		+
345	STT3A		+	+		345	TI17B		+
346	STX12		+			346	TIMM23; TIMM23B	+	+
347	STX17		+			347	TIMM50	+	+
348	STX7		+	+		348	TM165		+
349	SUCLG1		+			349	TM209		+
350	TAP1			+		350	TM9SF3; RP11-34E5.1		+
351	TAP2		+			351	TMCO1		+
352	TAPBP		+			352	TMED10		+
353	TARS2;TARSL1		+			353	TMEM126A		+
354	TBL2		+	+		354	TMM33	+	+
355	TBRG4		+			355	TNPO1		+
356	TCP1		+			356	TNPO3		+
357	TECR		+			357	TOM40	+	+
358	TIMM21		+			358	TOMM22		+
359	TIMM23; TIMM23B		+			359	TRAM1		+
360	TIMM50		+			360	TRI27		+
361	TIRAP3;TMED7;TMED7-TICAM2			+		361	TRIP13		+
362	TM7SF2		+			362	TUBA1C		+
363	TM9SF1		+			363	TUBB6		+
364	TM9SF3; RP11-34E5.1		+	+		364	TUFM	+	+
365	TM9SF4		+			365	UBE3C		+
366	TMED10		+	+		366	UBL4A		+
367	TMED4		+	+		367	UCK2		+
368	TMED9		+	+		368	UNC45A		+
369	TMEM11			+		369	UQCRC2		+
370	TMEM126A		+			370	USP9X		+
371	TMEM177		+			371	VATH		+
372	TMEM214		+			372	WDR6		+
373	TMEM230;C20orf30		+	+		373	XPO1	+	+
374	TMPO		+			374	XPO2; CSE1L	+	+
375	TMTC3		+			375	XPO5		+
376	TMUB1			+		376	XPO7		+
377	TMX2		+			377	XPOT	+	+
378	TNPO3	+		+		378	YME1L1		+
379	TOMM22		+			379	YTHD2		+
380	TRABD		+			380	ZW10		+
381	TRIM4		+	+		Total		110	380
382	TRIP13		+	+
383	TUBA1A;TUBA3C;TUBA3E	+	+	+
384	TUBA1C		+
385	TUBB		+
386	TUBB2A;TUBB2B		+
387	TUBB4B		+	+
388	TUBB6	+	+	+
389	TUBB8;RP11-631M21.2		+
390	TUFM		+
391	UBA2		+	+
392	UBL4A		+
393	UFL1		+	+
394	UFSP2		+
395	UNC45A		+	+
396	UQCR10		+
397	UQCRC2		+
398	UQCRQ		+	+
399	VAMP7			+
400	VAMP8		+	+
401	VAPA		+	+
402	VAPB		+	+
403	VARS2		+
404	XPO1		+	+
405	XPO2; CSE1L			+
406	XPO5			+
407	XPO7			+
408	YIPF6			+
409	YME1L1		+
Total		32	364	166
