# Supplementary material for: S6K1 phosphorylates Cdk1 and MSH6 to regulate DNA repair
Source: eLife. 2022 Oct 3;11:e79128. doi: 10.7554/eLife.79128 (PMC9529248; doi:10.7554/eLife.79128)
Supplement: Supplementary file 2. [file elife-79128-supp2.xlsx]

## Sheet: Sheet1
Supplementary File 2. Shared proteins from Venn diagrams(Figure 2 - figure supplement 1 b-d)
Shared S6K1 targets between the two studies						Shared S6K1 targets (This study and BioGrid)		Shared S6K1 targets (Pavan, et al. and BioGrid)
RPS6KB1	SF3B3	RPS19	PSMD3	DDOST		MTOR		RPS6
C1QBP	CCT5	RAN	AIFM1	PNO1		RPS6KB1		POLDIP3
HSP90AA1	MYH10	ATP5H	PRKDC	MSH6		UBL4A		RPS6KB1
TUBA1C	MYH9	RPN2	LBR	CCT4		XPO1		TRIM25
TCP1	RPS10	RUVBL1	UQCRC2	PRDX2		HSP90AA1		ACTA1
PCNA	SLC25A6	SLC16A1	NDUFA4	BAG2				ELAVL1
MYL6	RFC2	SLC25A13	ATAD3A	HSD17B12				HSP90AA1
RCN2	RFC3	AGK	SFXN1	DDB1
RPS27	TUFM	DNAJA1	ATP5C1	CAD
ILF2	DNAJA2	SAMHD1	SLC25A11	CDC37
