# Supplementary material for: S6K1 phosphorylates Cdk1 and MSH6 to regulate DNA repair
Source: eLife. 2022 Oct 3;11:e79128. doi: 10.7554/eLife.79128 (PMC9529248; doi:10.7554/eLife.79128)
Supplement: Supplementary file 3. — Possible RX(RXXS) S6K1 phosphorylation motifs on MSH2, MSH6 and CDK1 identified by phosphonet; http://www.phosphonet.ca/ (RXXS), marked in gray, represents the core motif shared by all S6K1 substrates. X, any amino acid, R, Argenine and S, Serine. The putative phosphorylated serine is highlighted in red. [file elife-79128-supp3.xlsx]

## Sheet: Sheet1
Supplementary File 3. Predicted S6K1 phosphorylation sites (Phosphonet)
Protein name	site No.	RX(RXXS) motif	also phosphorylated by
MSH6	Ser242	TQGSRRSSRQIKKRR
	Ser252	IKKRRVISDSESDIG	CK2
	Ser309	RMVTGNGSLKRKSSR	PKC
	Ser315	GSLKRKSSRKETPSA
	Ser341	KNTLRAFSAPQNSES
	Ser580	FSDDRHCSRFRTLVA
	Ser65	RPLARSASPPKAKNL
	Ser718	PLDSDTVSTTRSGAI
	Ser823	PDLERLLSKIHNVGS
	Ser137	HVQFFDDSPTRGWVS	CDK2,CDK3
	Ser1028	AEERRDVSLKDCMRR
	Ser1185	GASDRIMSGESTFFV
CDK1 (Cdc2)	Ser39	MKKIRLESEEEGVPS	CK2
	Ser53	STAIREISLLKELRH
