# Supplementary material for: S6K1 phosphorylates Cdk1 and MSH6 to regulate DNA repair
Source: eLife. 2022 Oct 3;11:e79128. doi: 10.7554/eLife.79128 (PMC9529248; doi:10.7554/eLife.79128)
Supplement: Supplementary file 4. [file elife-79128-supp4.xlsx]

## Sheet: Summary Phosphorylation site
Supplementary File 4 Phosphorylated sites - in vitro kinase assay
		Serine (S)	Thrreonine (T)	S also phosphorylated by	T also phosphorylated by
	CDK1	39	25	CK2
			26
			141
			240
	MSH6	5	3
		7	213		CK2
		41	305	MAPK	pim1,pim2,pm3
		51	336
		79	523	DMPK,PAKB
		252		CK2
		254		CK2
		256		CK2
		285
		292
		309		PKC
		328
		341
		346
		525
		664

## Sheet: Phosphorylation site
Supplementary File 4. Phosphorylated sites - in vitro kinase assay
Unique identifier	Gene names	Protein names	Protein	Leading proteins	Positions within proteins	Proteins	Position	Localization prob	Multiplicity	Amino acid	Intensity MSH2+S6K1_7b	Intensity MSH2+S6K1_7a	Intensity MSH2_6b	Intensity MSH2_6a	Intensity hisMSH6+S6K1_9b	Intensity hisMSH6+S6K1_9a	Intensity hisMSH6_8b	Intensity hisMSH6_8a	Intensity His-CDK1+S6K1_5b	Intensity His-CDK1+S6K1_5a	Intensity His-CDK1_4b	Intensity His-CDK1_4a	Intensity GSTS6+S6K1_3b	Intensity GSTS6+S6K1_3a	Intensity GSTS6_1b	Intensity GSTS6_1a
UID329			Q8N8K9-2	Q8N8K9-2	410;410	Q8N8K9-2;Q8N8K9-3	410	0.670603	___3	S	23.3195	23.814	NaN	NaN	22.964	NaN	NaN	NaN	22.2252	22.8381	NaN	NaN	23.0743	21.3011	NaN	NaN
UID65	SV2A	Synaptic vesicle glycoprotein 2A	Q7L0J3	Q7L0J3	42;42	Q7L0J3;Q7L0J3-2	42	1	___1	S	NaN	22.5346	NaN	NaN	22.5403	NaN	NaN	NaN	22.1756	22.5229	NaN	NaN	21.9703	21.5488	NaN	NaN
UID101	MSH6	DNA mismatch repair protein Msh6	P52701	P52701	305;305;304;175	P52701;P52701-2;A0A087WWJ1;P52701-3	305	1	___1	T	30.5961	30.2303	NaN	NaN	29.194	29.8404	21.3416	NaN	NaN	NaN	NaN	NaN	22.5579	21.6236	NaN	NaN
UID104	MSH6	DNA mismatch repair protein Msh6	P52701-4	P52701-4	3	P52701-4	3	1	___1	T	30.5961	30.2303	NaN	NaN	29.194	29.8404	21.3416	NaN	NaN	NaN	NaN	NaN	22.5579	21.6236	NaN	NaN
UID262	SPATA2	Spermatogenesis-associated protein 2	Q9UM82	Q9UM82	148	Q9UM82	148	0.99918	___2	Y	21.8695	22.804	NaN	NaN	22.4727	23.0212	NaN	23.137	NaN	NaN	22.9322	NaN	NaN	21.7106	NaN	22.3749
UID228	RPS6KB1	Ribosomal protein S6 kinase beta-1	P23443	P23443	256;256;233;233;203	P23443;P23443-4;P23443-5;P23443-2;P23443-3	256	0.590042	___2	T	NaN	NaN	NaN	NaN	NaN	NaN	NaN	NaN	NaN	NaN	NaN	NaN	NaN	22.3587	NaN	NaN
UID124	SULT1C3	Sulfotransferase 1C3	Q6IMI6	Q6IMI6	202;202	Q6IMI6;Q6IMI6-2	202	0.99258	___1	Y	NaN	NaN	NaN	NaN	NaN	NaN	NaN	NaN	NaN	NaN	NaN	NaN	24.2747	23.2109	22.1405	21.3818
UID17			CON__P02666	CON__P02666	35	CON__P02666	35	1	___1	S	23.5316	22.6019	NaN	NaN	24.249	24.3487	27.5339	NaN	21.2523	25.8404	20.8955	20.8267	23.5522	23.306	24.3879	25.342
UID12			CON__P02662	CON__P02662	115	CON__P02662	115	1	___1	S	23.5031	23.7749	NaN	NaN	24.4097	25.1293	27.9877	NaN	NaN	27.128	NaN	NaN	23.5529	23.3785	22.8255	26.3998
UID66			Q8IVA1-2	Q8IVA1-2	15	Q8IVA1-2	15	0.999924	___1	S	24.7176	24.762	NaN	NaN	24.4725	23.6244	NaN	NaN	23.6829	23.7791	NaN	NaN	24.0734	23.4437	NaN	NaN
UID264	RPS6	40S ribosomal protein S6	P62753	A2A3R5;P62753	204;235	A2A3R5;P62753	235	0.999994	___3	S	NaN	NaN	NaN	NaN	NaN	NaN	NaN	NaN	NaN	NaN	NaN	NaN	24.978	23.4716	NaN	NaN
UID266	RPS6	40S ribosomal protein S6	P62753	A2A3R5;P62753	209;240	A2A3R5;P62753	240	0.941556	___3	S	NaN	NaN	NaN	NaN	NaN	NaN	NaN	NaN	NaN	NaN	NaN	NaN	24.978	23.4716	NaN	NaN
UID226	RPS6KB1	Ribosomal protein S6 kinase beta-1	P23443	P23443	250;250;227;227;197	P23443;P23443-4;P23443-5;P23443-2;P23443-3	250	0.974374	___2	T	NaN	24.9349	NaN	NaN	25.1551	25.4544	NaN	NaN	21.4801	24.9721	NaN	NaN	24.8841	23.5196	NaN	NaN
UID87	PDPK1	3-phosphoinositide-dependent protein kinase 1	O15530	O15530	513;486;463;487;386	O15530;E9PER6;O15530-2;O15530-3;O15530-4	513	1	___1	T	24.9685	25.6374	NaN	NaN	24.2831	NaN	NaN	NaN	25.5752	25.4283	NaN	NaN	24.4391	23.6861	NaN	NaN
UID134	RPS6	40S ribosomal protein S6	P62753	A2A3R5;P62753	205;236	A2A3R5;P62753	236	0.999795	___2	S	NaN	NaN	NaN	NaN	NaN	NaN	NaN	NaN	NaN	NaN	NaN	NaN	22.074	23.7706	NaN	NaN
UID135	RPS6	40S ribosomal protein S6	P62753	A2A3R5;P62753	209;240	A2A3R5;P62753	240	0.941556	___2	S	NaN	NaN	NaN	NaN	NaN	NaN	NaN	NaN	NaN	NaN	NaN	NaN	22.074	23.7706	NaN	NaN
UID1	RPS6	40S ribosomal protein S6	P62753	A2A3R5;P62753	117;148	A2A3R5;P62753	148	1	___1	S	NaN	NaN	NaN	NaN	NaN	NaN	NaN	NaN	NaN	NaN	NaN	NaN	24.371	23.854	20.708	NaN
UID76	RPS6	40S ribosomal protein S6	P62753	A2A3R5;P62753	94;125	A2A3R5;P62753	125	0.986573	___1	T	NaN	NaN	NaN	NaN	NaN	NaN	NaN	NaN	NaN	NaN	NaN	NaN	24.2503	24.1062	22.6039	21.4591
UID251	B3GALT2	Beta-1,3-galactosyltransferase 2	O43825	O43825	62	O43825	62	0.950487	___2	Y	25.041	24.4459	NaN	NaN	25.1222	24.4165	NaN	NaN	25.0607	24.7923	NaN	NaN	23.9895	24.1132	NaN	NaN
UID178	RPS6KB1	Ribosomal protein S6 kinase beta-1	P23443	P23443	384;384;361;361;331	P23443;P23443-4;P23443-5;P23443-2;P23443-3	384	0.99991	___2	S	24.1363	23.744	NaN	NaN	23.6055	23.5322	NaN	NaN	24.3994	23.8794	NaN	NaN	23.9355	24.4721	NaN	NaN
UID173	RPS6KB1	Ribosomal protein S6 kinase beta-1	P23443	P23443	243;243;220;220;190	P23443;P23443-4;P23443-5;P23443-2;P23443-3	243	0.994491	___2	S	NaN	25.0766	NaN	NaN	24.6121	24.3622	NaN	NaN	25.34	25.7993	NaN	NaN	25.1209	24.6583	NaN	NaN
UID225	RPS6KB1	Ribosomal protein S6 kinase beta-1	P23443	P23443	248;248;225;225;195	P23443;P23443-4;P23443-5;P23443-2;P23443-3	248	0.999836	___2	T	24.9653	24.9349	NaN	NaN	25.1551	25.4544	NaN	NaN	25.0269	24.9721	NaN	NaN	24.8841	24.7536	NaN	NaN
UID22	PDPK1;PDPK2P	3-phosphoinositide-dependent protein kinase 1;Putative 3-phosphoinositide-dependent protein kinase 2	O15530	O15530	241;214;191;114;241;214	O15530;E9PER6;O15530-2;O15530-4;O15530-5;Q6A1A2	241	1	___1	S	24.4779	25.2459	NaN	NaN	22.8071	24.4614	NaN	NaN	24.7052	24.7301	NaN	NaN	24.8135	25.1171	NaN	NaN
UID240	QRICH2	Glutamine-rich protein 2	Q9H0J4	Q9H0J4	183;183	Q9H0J4;Q9H0J4-2	183	0.99854	___2	T	NaN	21.8843	NaN	NaN	NaN	NaN	NaN	NaN	NaN	NaN	NaN	NaN	26.0809	25.4072	NaN	NaN
UID241	QRICH2	Glutamine-rich protein 2	Q9H0J4	Q9H0J4	185;185	Q9H0J4;Q9H0J4-2	185	0.924119	___2	T	NaN	21.8843	NaN	NaN	NaN	NaN	NaN	NaN	NaN	NaN	NaN	NaN	26.0809	25.4072	NaN	NaN
UID78	RPS6	40S ribosomal protein S6	A2A3R5	A2A3R5	3	A2A3R5	3	1	___1	T	NaN	NaN	NaN	NaN	NaN	NaN	NaN	NaN	NaN	NaN	NaN	NaN	26.0511	25.4303	20.2385	19.4371
UID105	RPS6	40S ribosomal protein S6	P62753	P62753	34;34	P62753;A2A3R7	34	1	___1	T	NaN	NaN	NaN	NaN	NaN	NaN	NaN	NaN	NaN	NaN	NaN	NaN	26.0511	25.4303	20.2385	19.4371
UID94	RPS6KB1	Ribosomal protein S6 kinase beta-1	P23443	P23443	248;248;225;225;195	P23443;P23443-4;P23443-5;P23443-2;P23443-3	248	0.999836	___1	T	25.8365	NaN	NaN	NaN	24.7002	23.3643	NaN	NaN	23.3211	24.9825	NaN	NaN	NaN	25.4313	NaN	NaN
UID174	RPS6KB1	Ribosomal protein S6 kinase beta-1	P23443	P23443	75;75;75;52;22;75;22	P23443;P23443-4;P23443-5;P23443-2;P23443-3;K7ER06;K7EIM2	75	1	___2	S	25.836	26.7827	NaN	NaN	25.9751	26.135	NaN	NaN	26.1361	26.3062	NaN	NaN	26.1144	25.6583	NaN	NaN
UID244	TADA2A;TADA2L	Transcriptional adapter 2-alpha	O75478	O75478	431;431	O75478;A0A024R0Y4	431	1	___2	Y	25.2357	NaN	NaN	NaN	NaN	NaN	NaN	NaN	NaN	28.3719	NaN	NaN	26.9728	25.8856	NaN	NaN
UID265	RPS6	40S ribosomal protein S6	P62753	A2A3R5;P62753	205;236	A2A3R5;P62753	236	0.999795	___3	S	NaN	NaN	NaN	NaN	NaN	NaN	NaN	NaN	NaN	NaN	NaN	NaN	25.5733	25.9664	NaN	NaN
UID267	RPS6	40S ribosomal protein S6	P62753	A2A3R5;P62753	213;244	A2A3R5;P62753	244	0.925999	___3	S	NaN	NaN	NaN	NaN	NaN	NaN	NaN	NaN	NaN	NaN	NaN	NaN	25.5733	25.9664	NaN	NaN
UID62	RPS6	40S ribosomal protein S6	P62753	P62753	6;6	P62753;A2A3R7	6	1	___1	S	NaN	NaN	NaN	NaN	NaN	NaN	NaN	NaN	NaN	NaN	NaN	NaN	25.899	26.1457	24.1873	23.8032
UID80	CDC42EP3	Cdc42 effector protein 3	Q9UKI2	Q9UKI2	5;5;5;5	Q9UKI2;C9JKW5;C9J7F7;C9JEZ4	5	0.999007	___1	T	NaN	NaN	NaN	NaN	NaN	NaN	NaN	NaN	NaN	NaN	NaN	NaN	26.8677	26.2348	23.1085	24.2833
UID175	RPS6KB1	Ribosomal protein S6 kinase beta-1	P23443	P23443	78;78;78;55;25;78;25	P23443;P23443-4;P23443-5;P23443-2;P23443-3;K7ER06;K7EIM2	78	0.99985	___2	S	26.0455	27.3986	NaN	NaN	26.3154	26.4364	NaN	NaN	26.7853	NaN	NaN	NaN	26.7558	26.2693	NaN	NaN
UID229	RPS6KB1	Ribosomal protein S6 kinase beta-1	P23443	P23443	77;77;77;54;24;77;24	P23443;P23443-4;P23443-5;P23443-2;P23443-3;K7ER06;K7EIM2	77	0.996404	___2	T	26.0455	NaN	NaN	NaN	NaN	NaN	NaN	NaN	NaN	26.5265	NaN	NaN	NaN	26.2693	NaN	NaN
UID43	RPS6KB1	Ribosomal protein S6 kinase beta-1	P23443	P23443	75;75;75;52;22;75;22	P23443;P23443-4;P23443-5;P23443-2;P23443-3;K7ER06;K7EIM2	75	1	___1	S	26.5992	26.7272	NaN	NaN	26.4347	26.7542	NaN	NaN	26.7863	26.6954	NaN	NaN	26.5764	26.3587	NaN	NaN
UID176	RPS6KB1	Ribosomal protein S6 kinase beta-1	P23443	P23443	375;375;352;352;322	P23443;P23443-4;P23443-5;P23443-2;P23443-3	375	1	___2	S	27.467	27.0843	NaN	NaN	27.3833	27.2632	NaN	NaN	27.2527	27.2589	NaN	NaN	26.9469	26.6004	NaN	NaN
UID177	RPS6KB1	Ribosomal protein S6 kinase beta-1	P23443	P23443	380;380;357;357;327	P23443;P23443-4;P23443-5;P23443-2;P23443-3	380	0.999995	___2	S	27.467	NaN	NaN	NaN	27.3833	27.2632	NaN	NaN	27.2527	27.2589	NaN	NaN	NaN	26.6004	NaN	NaN
UID46	RPS6KB1	Ribosomal protein S6 kinase beta-1	P23443	P23443	380;380;357;357;327	P23443;P23443-4;P23443-5;P23443-2;P23443-3	380	0.999995	___1	S	27.0938	27.378	NaN	NaN	26.7778	26.8253	NaN	NaN	26.9537	27.0279	NaN	NaN	27.3666	26.9301	NaN	NaN
UID44	RPS6KB1	Ribosomal protein S6 kinase beta-1	P23443	P23443	78;78;78;55;25;78;25	P23443;P23443-4;P23443-5;P23443-2;P23443-3;K7ER06;K7EIM2	78	0.99985	___1	S	27.7575	27.8233	NaN	NaN	27.2257	27.6522	NaN	NaN	27.6011	27.5103	NaN	NaN	27.5971	27.2976	NaN	NaN
UID163	USP32	Ubiquitin carboxyl-terminal hydrolase 32;Ubiquitin carboxyl-terminal hydrolase	Q8NFA0	Q8NFA0	1416;17;1086	Q8NFA0;K7EN13;K7EQL6	1416	0.935959	___2	S	NaN	NaN	NaN	NaN	NaN	NaN	NaN	NaN	NaN	NaN	NaN	NaN	28.089	27.6991	24.9074	25.433
UID164	USP32	Ubiquitin carboxyl-terminal hydrolase 32;Ubiquitin carboxyl-terminal hydrolase	Q8NFA0	Q8NFA0	1421;22;1091	Q8NFA0;K7EN13;K7EQL6	1421	0.935959	___2	S	NaN	NaN	NaN	NaN	NaN	NaN	NaN	NaN	NaN	NaN	NaN	NaN	28.089	27.6991	24.9074	25.433
UID30	RPL3	60S ribosomal protein L3	P39023	P39023	13;40;45;13	P39023;H7C422;H7C3M2;F8WCR1	13	1	___1	S	NaN	NaN	NaN	NaN	NaN	NaN	NaN	NaN	NaN	NaN	NaN	NaN	28.6619	27.7872	NaN	NaN
UID98	RPS6KB1	Ribosomal protein S6 kinase beta-1	P23443	P23443	77;77;77;54;24;77;24	P23443;P23443-4;P23443-5;P23443-2;P23443-3;K7ER06;K7EIM2	77	0.996404	___1	T	22.2316	24.5019	NaN	NaN	24.0533	NaN	NaN	NaN	28.0632	27.7853	NaN	NaN	24.4916	29.0102	NaN	NaN
UID95	RPS6KB1	Ribosomal protein S6 kinase beta-1	P23443	P23443	250;250;227;227;197	P23443;P23443-4;P23443-5;P23443-2;P23443-3	250	0.974374	___1	T	NaN	NaN	NaN	NaN	NaN	NaN	NaN	NaN	NaN	27.5477	NaN	NaN	28.6839	29.3358	NaN	NaN
UID45	RPS6KB1	Ribosomal protein S6 kinase beta-1	P23443	P23443	375;375;352;352;322	P23443;P23443-4;P23443-5;P23443-2;P23443-3	375	1	___1	S	29.5076	30.2704	NaN	NaN	29.807	29.7469	NaN	NaN	29.7294	30.3473	NaN	NaN	29.9076	29.5625	NaN	NaN
UID115	SPTAN1	Spectrin alpha chain, non-erythrocytic 1	Q13813	Q13813	26;26;26;38;26;26	Q13813;Q13813-3;Q13813-2;A0A0D9SFF6;A0A0D9SF54;A0A0D9SGF6	26	1	___1	Y	NaN	NaN	NaN	NaN	NaN	NaN	NaN	NaN	NaN	NaN	NaN	NaN	29.7794	29.6176	28.2237	26.3135
UID227	RPS6KB1	Ribosomal protein S6 kinase beta-1	P23443	P23443	252;252;229;229;199	P23443;P23443-4;P23443-5;P23443-2;P23443-3	252	0.999884	___2	T	28.2286	27.8991	NaN	NaN	27.7976	29.478	NaN	NaN	29.614	30.1142	NaN	NaN	29.3972	29.6927	NaN	NaN
UID24	SOX5		F5H876	F5H876	239	F5H876	239	1	___1	S	NaN	NaN	NaN	NaN	NaN	NaN	NaN	NaN	NaN	NaN	NaN	NaN	30.3149	29.8213	29.102	28.2704
UID123	RPS6KB1	Ribosomal protein S6 kinase beta-1	P23443	P23443	11;11;11;11;11	P23443;P23443-4;P23443-5;K7ER06;K7EMM2	11	1	___1	Y	32.768	32.9355	NaN	NaN	32.3931	32.6936	21.1264	22.6684	32.9847	32.6583	21.5113	22.5834	32.4214	32.4176	NaN	NaN
UID116	PDK1	[Pyruvate dehydrogenase (acetyl-transferring)] kinase isozyme 1, mitochondrial	Q15118	Q15118	163;87;81;183	Q15118;C9JKT3;C9IYB4;Q15118-2	163	0.999994	___1	Y	33.4161	33.6172	33.4882	NaN	33.5388	33.3672	33.214	33.1991	33.0706	33.1292	32.65	33.1094	32.9509	33.1011	33.2312	32.3302
UID96	RPS6KB1	Ribosomal protein S6 kinase beta-1	P23443	P23443	252;252;229;229;199	P23443;P23443-4;P23443-5;P23443-2;P23443-3	252	0.999884	___1	T	33.4783	33.485	NaN	24.5845	33.2614	32.8649	23.5305	23.8688	32.877	33.0768	NaN	24.4287	26.226	33.358	NaN	NaN
UID52	MSH6	DNA mismatch repair protein Msh6	P52701	P52701	292;292;291;162	P52701;P52701-2;A0A087WWJ1;P52701-3	292	0.999257	___1	S	22.7972	22.7541	NaN	NaN	22.6439	22.9984	NaN	NaN	NaN	NaN	NaN	NaN	NaN	NaN	NaN	NaN
UID55	MSH6	DNA mismatch repair protein Msh6	P52701	P52701	309;309;308;179	P52701;P52701-2;A0A087WWJ1;P52701-3	309	1	___1	S	23.1238	22.8946	NaN	NaN	NaN	NaN	NaN	NaN	NaN	NaN	NaN	NaN	NaN	NaN	NaN	NaN
UID61	MSH6	DNA mismatch repair protein Msh6	P52701-4	P52701-4	7	P52701-4	7	1	___1	S	23.1238	22.8946	NaN	NaN	NaN	NaN	NaN	NaN	NaN	NaN	NaN	NaN	NaN	NaN	NaN	NaN
UID186	MSH6	DNA mismatch repair protein Msh6	P52701	P52701	309;309;308;179	P52701;P52701-2;A0A087WWJ1;P52701-3	309	1	___2	S	23.5267	23.6383	NaN	NaN	22.1028	22.745	NaN	NaN	NaN	NaN	NaN	NaN	NaN	NaN	NaN	NaN
UID192	MSH6	DNA mismatch repair protein Msh6	P52701-4	P52701-4	7	P52701-4	7	1	___2	S	23.5267	23.6383	NaN	NaN	22.1028	22.745	NaN	NaN	NaN	NaN	NaN	NaN	NaN	NaN	NaN	NaN
UID232	MSH6	DNA mismatch repair protein Msh6	P52701	P52701	305;305;304;175	P52701;P52701-2;A0A087WWJ1;P52701-3	305	1	___2	T	23.5267	23.6383	NaN	NaN	22.1028	22.745	NaN	NaN	NaN	NaN	NaN	NaN	NaN	NaN	NaN	NaN
UID235	MSH6	DNA mismatch repair protein Msh6	P52701-4	P52701-4	3	P52701-4	3	1	___2	T	23.5267	23.6383	NaN	NaN	22.1028	22.745	NaN	NaN	NaN	NaN	NaN	NaN	NaN	NaN	NaN	NaN
UID190	MSH6	DNA mismatch repair protein Msh6	P52701	P52701	256;256;255;126	P52701;P52701-2;A0A087WWJ1;P52701-3	256	0.741665	___2	S	NaN	23.6503	NaN	NaN	22.2047	22.944	NaN	NaN	NaN	NaN	NaN	NaN	NaN	NaN	NaN	NaN
UID114	FAM149A	Protein FAM149A	A5PLN7	A5PLN7	411;120;120;402;411	A5PLN7;A0A0A0MRZ3;A5PLN7-2;A5PLN7-4;A5PLN7-3	411	1	___1	Y	23.9067	23.8756	23.3705	24.0403	22.7533	NaN	NaN	NaN	NaN	NaN	NaN	NaN	NaN	NaN	NaN	NaN
UID102	MSH6	DNA mismatch repair protein Msh6	P52701	P52701;P52701-4	336;336;335;206;34	P52701;P52701-2;A0A087WWJ1;P52701-3;P52701-4	336	0.941023	___1	T	23.3173	23.8875	NaN	NaN	22.4483	22.0581	NaN	NaN	NaN	NaN	NaN	NaN	NaN	NaN	NaN	NaN
UID119	CLUAP1	Clusterin-associated protein 1	Q96AJ1	Q96AJ1	18;18;18;18;18	Q96AJ1;I3L455;I3L1J4;I3L3S9;J3KNW5	18	0.919495	___1	Y	24.2107	24.3177	NaN	23.452	22.3304	22.6781	NaN	22.7597	24.895	25.2163	24.6473	24.0288	NaN	NaN	NaN	NaN
UID106	ANK3	Ankyrin-3	Q12955	Q12955	2508	Q12955	2508	1	___1	T	NaN	24.5589	NaN	NaN	23.1367	NaN	22.2049	NaN	26.7329	26.4316	26.4008	NaN	NaN	NaN	NaN	NaN
UID100	MSH6	DNA mismatch repair protein Msh6	P52701	P52701;P52701-4	523;523;522;393;221	P52701;P52701-2;A0A087WWJ1;P52701-3;P52701-4	523	0.944627	___1	T	24.4122	24.772	NaN	NaN	23.3839	23.5911	NaN	NaN	NaN	NaN	NaN	NaN	NaN	NaN	NaN	NaN
UID48	MSH6	DNA mismatch repair protein Msh6	P52701	P52701;P52701-4	341;341;340;211;39	P52701;P52701-2;A0A087WWJ1;P52701-3;P52701-4	341	0.891003	___1	S	NaN	24.8138	NaN	NaN	24.9413	24.3576	NaN	NaN	NaN	NaN	NaN	NaN	NaN	NaN	NaN	NaN
UID93	ATP6V1C1	V-type proton ATPase subunit C 1	P21283	P21283	2	P21283	2	0.993331	___1	T	24.3664	24.9098	23.6637	23.8528	24.2253	23.6726	23.5743	24.0592	NaN	NaN	NaN	NaN	NaN	NaN	NaN	NaN
UID103	MSH6	DNA mismatch repair protein Msh6	P52701	P52701	213;213;212;114	P52701;P52701-2;A0A087WWJ1;C9J7Y7	213	0.66571	___1	T	NaN	25.3323	NaN	NaN	24.1607	23.9932	NaN	NaN	NaN	NaN	NaN	NaN	NaN	NaN	NaN	NaN
UID74	LAMA3	Laminin subunit alpha-3	Q16787	Q16787	2753;1013;1088;1144;2697;1088;1144;2697	Q16787;K7EIP4;A0A0A0MTS5;A0A0A6YYF2;A0A0A0MSA0;Q16787-4;Q16787-1;Q16787-3	2753	0.5	___1	T	25.8385	25.5139	25.9498	NaN	NaN	25.9448	28.9717	25.6164	NaN	NaN	20.7401	19.9462	NaN	NaN	NaN	NaN
UID75	LAMA3	Laminin subunit alpha-3	Q16787	Q16787	2757;1017;1092;1148;2701;1092;1148;2701	Q16787;K7EIP4;A0A0A0MTS5;A0A0A6YYF2;A0A0A0MSA0;Q16787-4;Q16787-1;Q16787-3	2757	0.5	___1	T	25.8385	25.5139	25.9498	NaN	NaN	25.9448	28.9717	25.6164	NaN	NaN	20.7401	19.9462	NaN	NaN	NaN	NaN
UID26	MSH6	DNA mismatch repair protein Msh6	P52701	F8W7G9;P52701	43;43;43;43;43	F8W7G9;P52701;P52701-2;P52701-3;F8WAX8	43	0.873433	___1	S	NaN	25.5372	NaN	NaN	24.352	NaN	NaN	NaN	NaN	NaN	NaN	NaN	NaN	NaN	NaN	NaN
UID379	RELA		E9PNV4	E9PNV4	114	E9PNV4	114	1	___3	Y	25.5075	25.6526	NaN	NaN	NaN	NaN	NaN	NaN	NaN	NaN	NaN	NaN	25.5097	NaN	NaN	NaN
UID112	DKK4	Dickkopf-related protein 4;Dickkopf-related protein 4 short form	Q9UBT3	Q9UBT3	184	Q9UBT3	184	1	___1	T	26.762	25.6661	27.2913	NaN	25.8253	26.6544	26.3264	26.671	NaN	NaN	NaN	NaN	NaN	NaN	NaN	NaN
UID54	MSH6	DNA mismatch repair protein Msh6	P52701	P52701;P52701-4	525;525;524;395;223	P52701;P52701-2;A0A087WWJ1;P52701-3;P52701-4	525	1	___1	S	25.6337	26.2729	NaN	NaN	25.4771	25.5455	NaN	NaN	NaN	NaN	NaN	NaN	NaN	NaN	NaN	NaN
UID53	MSH6	DNA mismatch repair protein Msh6	P52701	P52701;P52701-4	664;664;663;534;362	P52701;P52701-2;A0A087WWJ1;P52701-3;P52701-4	664	0.994382	___1	S	26.1514	26.8437	NaN	NaN	25.9655	25.6853	NaN	NaN	NaN	NaN	NaN	NaN	NaN	NaN	NaN	NaN
UID27	MSH6	DNA mismatch repair protein Msh6	P52701	F8W7G9;P52701	51;51;51;51;51	F8W7G9;P52701;P52701-2;P52701-3;F8WAX8	51	1	___1	S	27.6033	27.7625	NaN	NaN	26.8285	26.5846	NaN	NaN	NaN	NaN	NaN	NaN	NaN	NaN	NaN	NaN
UID69	OR5M3	Olfactory receptor 5M3	Q8NGP4	Q8NGP4	85	Q8NGP4	85	1	___1	S	NaN	27.7944	NaN	NaN	26.6251	27.2421	NaN	27.8693	NaN	NaN	23.2051	NaN	NaN	NaN	NaN	NaN
UID28	MSH6	DNA mismatch repair protein Msh6	P52701	F8W7G9;P52701	5;5;5;5;5;5	F8W7G9;P52701;P52701-2;A0A087WWJ1;P52701-3;F8WAX8	5	0.988276	___1	S	27.265	27.808	NaN	NaN	26.8395	27.0565	NaN	21.1636	NaN	NaN	NaN	NaN	NaN	NaN	NaN	NaN
UID60	MSH6	DNA mismatch repair protein Msh6	P52701	P52701	79;79;78;79	P52701;P52701-2;A0A087WWJ1;F8WAX8	79	1	___1	S	26.8614	27.8576	NaN	NaN	26.4902	27.2849	NaN	NaN	NaN	NaN	NaN	NaN	NaN	NaN	NaN	NaN
UID59	MSH6	DNA mismatch repair protein Msh6	P52701	P52701	256;256;255;126	P52701;P52701-2;A0A087WWJ1;P52701-3	256	0.741665	___1	S	NaN	27.8688	NaN	NaN	NaN	NaN	NaN	NaN	NaN	NaN	NaN	NaN	NaN	NaN	NaN	NaN
UID72	ZBTB21	Zinc finger and BTB domain-containing protein 21	Q9ULJ3	Q9ULJ3	179;179	Q9ULJ3;Q9ULJ3-2	179	0.999934	___1	S	28.9252	28.2065	28.8769	28.5519	27.034	27.7448	27.4136	26.6054	NaN	NaN	NaN	NaN	NaN	NaN	NaN	NaN
UID49	MSH6	DNA mismatch repair protein Msh6	P52701	P52701;P52701-4	346;346;345;216;44	P52701;P52701-2;A0A087WWJ1;P52701-3;P52701-4	346	0.984204	___1	S	28.8498	28.5806	NaN	NaN	26.9139	26.793	NaN	NaN	NaN	NaN	NaN	NaN	NaN	NaN	NaN	NaN
UID188	MSH6	DNA mismatch repair protein Msh6	P52701	P52701	252;252;251;122	P52701;P52701-2;A0A087WWJ1;P52701-3	252	1	___2	S	28.1296	28.6031	NaN	NaN	27.7286	27.0512	NaN	NaN	NaN	NaN	NaN	NaN	NaN	NaN	NaN	NaN
UID189	MSH6	DNA mismatch repair protein Msh6	P52701	P52701	254;254;253;124	P52701;P52701-2;A0A087WWJ1;P52701-3	254	0.999998	___2	S	28.1296	28.6031	NaN	NaN	27.7286	27.0512	NaN	NaN	NaN	NaN	NaN	NaN	NaN	NaN	NaN	NaN
UID25	MSH6	DNA mismatch repair protein Msh6	P52701	F8W7G9;P52701	41;41;41;41;41	F8W7G9;P52701;P52701-2;P52701-3;F8WAX8	41	0.975928	___1	S	28.5413	28.9441	22.9885	22.2947	27.8098	28.1056	NaN	NaN	NaN	NaN	NaN	NaN	NaN	NaN	NaN	NaN
UID56	MSH6	DNA mismatch repair protein Msh6	P52701	P52701;P52701-4	328;328;327;198;26	P52701;P52701-2;A0A087WWJ1;P52701-3;P52701-4	328	0.999143	___1	S	29.4095	29.3572	NaN	NaN	28.7313	28.4601	NaN	NaN	NaN	NaN	NaN	NaN	NaN	NaN	NaN	NaN
UID51	MSH6	DNA mismatch repair protein Msh6	P52701	P52701	285;285;284;155	P52701;P52701-2;A0A087WWJ1;P52701-3	285	0.991842	___1	S	30.6957	30.9825	NaN	NaN	29.9392	30.3062	NaN	NaN	NaN	NaN	NaN	NaN	NaN	NaN	NaN	NaN
UID23	C12orf4	Protein C12orf4	Q9NQ89	Q9NQ89	340;167	Q9NQ89;F5GXX6	340	0.696347	___1	S	NaN	31.1781	NaN	NaN	NaN	NaN	NaN	31.7045	NaN	24.5139	24.7978	23.9248	NaN	NaN	NaN	NaN
UID99			P35858-2	P35858-2	14	P35858-2	14	1	___1	T	31.1669	31.545	31.589	31.3089	30.3779	31.0285	30.6446	30.5681	22.2023	22.2812	22.3053	22.2107	NaN	NaN	NaN	NaN
UID6	USP17L1;USP17L4;USP17L3	Ubiquitin carboxyl-terminal hydrolase 17-like protein 1;Inactive ubiquitin carboxyl-terminal hydrolase 17-like protein 4;Ubiquitin carboxyl-terminal hydrolase 17-like protein 3	Q7RTZ2	Q7RTZ2	284;284;284	Q7RTZ2;A6NCW7;A6NCW0	284	1	___1	S	32.1312	32.2256	32.7539	33.189	32.9009	NaN	30.0181	32.2424	22.9833	24.2736	24.2685	25.2746	NaN	NaN	NaN	NaN
UID57	MSH6	DNA mismatch repair protein Msh6	P52701	P52701	252;252;251;122	P52701;P52701-2;A0A087WWJ1;P52701-3	252	1	___1	S	32.5928	32.5126	NaN	NaN	31.8769	32.4147	NaN	22.2968	NaN	NaN	NaN	NaN	NaN	NaN	NaN	NaN
UID58	MSH6	DNA mismatch repair protein Msh6	P52701	P52701	254;254;253;124	P52701;P52701-2;A0A087WWJ1;P52701-3	254	0.999998	___1	S	33.3642	34.2312	NaN	NaN	32.5632	32.9376	22.23	22.7227	NaN	NaN	NaN	NaN	NaN	NaN	NaN	NaN
UID201	RBM28	RNA-binding protein 28	Q9NW13	Q9NW13	509;368	Q9NW13;Q9NW13-2	509	0.666667	___2	S	34.606	34.6792	34.0204	34.1134	34.2521	33.6923	33.2213	34.5054	NaN	NaN	NaN	NaN	NaN	NaN	NaN	NaN
UID202	RBM28	RNA-binding protein 28	Q9NW13	Q9NW13	512;371	Q9NW13;Q9NW13-2	512	0.666667	___2	S	34.606	34.6792	34.0204	34.1134	34.2521	33.6923	33.2213	34.5054	NaN	NaN	NaN	NaN	NaN	NaN	NaN	NaN
UID242	RBM28	RNA-binding protein 28	Q9NW13	Q9NW13	511;370	Q9NW13;Q9NW13-2	511	0.666667	___2	T	34.606	34.6792	34.0204	34.1134	34.2521	33.6923	33.2213	34.5054	NaN	NaN	NaN	NaN	NaN	NaN	NaN	NaN
UID81			CON__P02663	CON__P02663	144	CON__P02663	144	0.641477	___1	T	NaN	NaN	NaN	NaN	NaN	23.1488	NaN	NaN	NaN	NaN	NaN	NaN	NaN	NaN	NaN	NaN
UID29	CD276		H3BM68	H3BM68	9	H3BM68	9	0.815203	___1	S	24.3516	NaN	NaN	23.7856	24.3556	23.2027	24.0536	24.6466	NaN	NaN	NaN	NaN	NaN	NaN	NaN	NaN
UID68	COLGALT1	Procollagen galactosyltransferase 1	Q8NBJ5	Q8NBJ5	516	Q8NBJ5	516	1	___1	S	26.764	NaN	27.0025	26.1577	25.1229	26.2249	25.3058	25.1505	NaN	NaN	NaN	NaN	NaN	NaN	NaN	NaN
UID118	CIRH1A	Cirhin	Q969X6	Q969X6	647;661;532	Q969X6;H3BSH7;Q969X6-2	647	1	___1	Y	27.9525	NaN	28.9896	28.3094	27.228	27.9199	26.9326	27.2865	25.6871	NaN	NaN	NaN	NaN	NaN	NaN	NaN
UID252	SVIL	Supervillin	O95425	O95425	1710;1284;1678;1683	O95425;O95425-2;O95425-4;O95425-3	1710	0.997961	___2	Y	NaN	NaN	NaN	NaN	NaN	NaN	NaN	NaN	21.5735	NaN	NaN	NaN	NaN	NaN	NaN	NaN
UID129	CFAP46	Cilia- and flagella-associated protein 46	Q8IYW2	Q8IYW2	969	Q8IYW2	969	1	___1	Y	NaN	NaN	22.4065	NaN	NaN	NaN	NaN	NaN	22.2731	NaN	22.8067	21.7459	NaN	NaN	NaN	NaN
UID88	CDK1;CDC2	Cyclin-dependent kinase 1	P06493	P06493	240;240;183	P06493;A0A024QZP7;P06493-2	240	0.966733	___1	T	NaN	NaN	NaN	NaN	NaN	NaN	NaN	NaN	22.6687	23.1454	NaN	NaN	NaN	NaN	NaN	NaN
UID89	CDK1;CDC2	Cyclin-dependent kinase 1	P06493	P06493	141;141;141;141	P06493;A0A024QZP7;A0A087WZZ9;E5RIU6	141	1	___1	T	NaN	NaN	NaN	NaN	NaN	NaN	NaN	NaN	23.9862	23.994	NaN	NaN	NaN	NaN	NaN	NaN
UID63	KIAA2022	Protein KIAA2022	Q5QGS0	Q5QGS0	1377	Q5QGS0	1377	0.5	___1	S	NaN	NaN	22.0421	22.7976	NaN	NaN	21.8378	21.6797	24.7739	24.5163	24.5639	24.4863	NaN	NaN	NaN	NaN
UID107	KIAA2022	Protein KIAA2022	Q5QGS0	Q5QGS0	1373	Q5QGS0	1373	0.5	___1	T	NaN	NaN	22.0421	22.7976	NaN	NaN	21.8378	21.6797	24.7739	24.5163	24.5639	24.4863	NaN	NaN	NaN	NaN
UID86	RAD50	DNA repair protein RAD50	Q92878	Q92878	198;198;198;59;204	Q92878;E7ESD9;E7EN38;Q92878-3;Q92878-2	198	0.999081	___1	T	NaN	NaN	NaN	NaN	NaN	NaN	NaN	NaN	25.3311	23.8018	NaN	23.4831	NaN	NaN	NaN	NaN
UID90	CDK1;CDC2	Cyclin-dependent kinase 1	P06493	P06493	25;25;25;25;25	P06493;A0A024QZP7;P06493-2;A0A087WZZ9;E5RIU6	25	0.5	___1	T	NaN	NaN	NaN	NaN	NaN	NaN	NaN	NaN	25.6549	NaN	19.8964	NaN	NaN	NaN	NaN	NaN
UID91	CDK1;CDC2	Cyclin-dependent kinase 1	P06493	P06493	26;26;26;26;26	P06493;A0A024QZP7;P06493-2;A0A087WZZ9;E5RIU6	26	0.5	___1	T	NaN	NaN	NaN	NaN	NaN	NaN	NaN	NaN	25.6549	NaN	19.8964	NaN	NaN	NaN	NaN	NaN
UID35	CDK1;CDC2	Cyclin-dependent kinase 1	P06493	P06493	39;39;39;39;39	P06493;A0A024QZP7;P06493-2;A0A087WZZ9;E5RIU6	39	1	___1	S	NaN	NaN	NaN	NaN	NaN	NaN	NaN	NaN	28.4945	28.4902	NaN	NaN	NaN	NaN	NaN	NaN
UID14			CON__P02663	CON__P02663	131	CON__P02663	131	0.988476	___1	S	NaN	NaN	NaN	NaN	19.6067	NaN	22.2422	NaN	NaN	19.7302	NaN	NaN	NaN	NaN	NaN	NaN
UID15			CON__P02663	CON__P02663	31	CON__P02663	31	0.999997	___1	S	NaN	NaN	NaN	NaN	NaN	NaN	23.0888	NaN	NaN	20.8073	NaN	NaN	NaN	NaN	NaN	22.6052
UID18	KRT13	Keratin, type I cytoskeletal 13	P13646	CON__P13646-1;P13646	427;427	CON__P13646-1;P13646	427	0.97076	___1	S	NaN	NaN	NaN	NaN	NaN	NaN	24.8042	NaN	NaN	21.5437	NaN	NaN	NaN	NaN	NaN	NaN
UID16			CON__P02663	CON__P02663	143	CON__P02663	143	0.912152	___1	S	NaN	NaN	NaN	NaN	23.3009	NaN	24.4212	NaN	NaN	22.3474	NaN	NaN	NaN	NaN	21.906	23.8133
UID144			CON__P02663	CON__P02663	129	CON__P02663	129	0.980503	___2	S	20.8421	NaN	NaN	NaN	22.3356	NaN	25.2342	NaN	NaN	23.4545	NaN	NaN	NaN	NaN	NaN	NaN
UID145			CON__P02663	CON__P02663	131	CON__P02663	131	0.988476	___2	S	20.8421	NaN	NaN	NaN	22.3356	NaN	25.2342	NaN	NaN	23.4545	NaN	NaN	NaN	NaN	NaN	NaN
UID122	MSH3	DNA mismatch repair protein Msh3	P20585	P20585	509	P20585	509	1	___1	Y	NaN	NaN	NaN	NaN	NaN	NaN	NaN	NaN	NaN	NaN	NaN	NaN	NaN	NaN	NaN	25.9863
UID257	KCNT2	Potassium channel subfamily T member 2	Q6UVM3	Q6UVM3	77;77;77;77	Q6UVM3;Q6UVM3-4;Q6UVM3-3;Q6UVM3-2	77	1	___2	Y	NaN	NaN	NaN	NaN	NaN	NaN	22.8832	NaN	NaN	NaN	NaN	NaN	NaN	NaN	NaN	NaN
UID326	DCLRE1A	DNA cross-link repair 1A protein	Q6PJP8	Q6PJP8	967	Q6PJP8	967	0.664194	___3	S	NaN	NaN	NaN	NaN	NaN	NaN	26.6129	NaN	NaN	NaN	NaN	NaN	NaN	NaN	NaN	NaN
UID387	DCLRE1A	DNA cross-link repair 1A protein	Q6PJP8	Q6PJP8	953	Q6PJP8	953	0.9994	___3	Y	NaN	NaN	NaN	NaN	NaN	NaN	26.6129	NaN	NaN	NaN	NaN	NaN	NaN	NaN	NaN	NaN
